# Supplementary material
Source: Research Square preprint supplement (doi:10.21203/rs.3.rs-8568329/v1)
Supplement: Supplementary file 1 [file 2a75cf9bb37f3f0832c179f3.docx]

**SECTION A: DEMOGRAPHIC CHARACTERISTICS**

1. District of assessment?
2. Mityana
3. Mukono
4. Kayunga
5. Nakasongola
6. Kiryandongo
7. Masindi
8. Hoima
9. Kagadi
10. Buliisa
11. Mitooma
12. Kyenjojo
13. Kumi
14. Tororo
15. Butaleja
16. Region of assessment
17. Central (Mityana, Mukono, Kayunga, Nakasongola)
18. Bunyoro (Kiryandongo, Masindi, Hoima, Kagadi, Bulisa)
19. Western (Mitoma, Kyenjojo)
20. Eastern (Kumi, Tororo, Butaleja)

3. Level of health facility

1. HCII
2. HCIII
3. HCIV

4. What is the age of the caretaker or household head? …………………………………...…………..

5. What is your marital status (caretaker)?

1. Single
2. Married
3. Divorced
4. Widowed

6. What is (caretaker) your religion?

1. Protestant
2. Catholic
3. Muslim
4. Born again
5. SDA
6. Others (Traditional and Pegan)

7. What is (caretaker) your highest level of education achieved?

1. No formal education
2. Primary
3. Secondary
4. Tertiary/ University

8. What is (caretaker) you occupation?

1. Unemployed
2. Peasant
3. Self employed
4. Professional
5. Structure of house
6. Grass thatched
7. Made of mud
8. Semi-permanent
9. Permanent
10. Approximately how much do you earn in a month in UGX? ……………………...……...……….
11. How many people live in this household? ……………………………...…………...……………
12. How many children under five years live in this household? …………………………………….

**SECTION B: MALARIA DIAGNOSIS**

1. Age of child? ………………………………………………………….…………………………..

1. Below 0-1 year

2. below 1-2 years

3. Below 2-3 years

4. Below 3-4 years

5. Below 4-5 years

2. Sex of child

- 1. Male
  2. Female

3. Was malaria severe or not?

1. Severe
2. Not severe

4. Type of Test used to confirm the malaria parasite in the baby?

1. RDT
2. Microscopy
3. Has the household had any person with malaria in the last six months?
4. Yes
5. No
6. On Average, how much do you spend on treating one episode of malaria in your household? (State UGX amount in figures)………………………..……………………
7. Have you received any information on likely side effects of antimalarials from a care health provider?
   1. Yes
   2. No
8. Have you had a follow up visit as advised by your health worker? (Usually 2 days after first consultation)
   1. Yes
   2. No

**SECTION D: KNOWLEDGE ABOUT MALARIA**

1. Have you ever had of any malaria massage?
   1. Yes
   2. No
2. How many days did you take from time of onset of symptoms to contacting the health Centre?
3. What medication were you given /Medicine Used? ………………….…………………………

1. ACT and Panadol

2. Injection and Pain Killer (Panadol/Diclo/Ibrofe)

3. ACT, Amoxicillin and Panadol

4. Fansider/Duocotexcin/Panadol

5. Used local herb at home

6. I don’t know

7. Referred

1. Season where malaria affects most
2. Dry season
3. Rainy season
4. Don’t know
5. Is malaria transmittable?
6. Yes
7. No

8. If yes, what are the mode of transmission?

1. Bite of a mosquitoes
2. Patient contact
3. Weather
4. I don’t know

9. Is malaria curable?

1. Yes
2. No

10. Is malaria preventable?

1. Yes
2. No

10.0 If yes, what are the preventive methods?

| **SN** | **Item** | **Responses** |
| --- | --- | --- |
| 10.1 | Use of IRS | 1. Yes  2. No |
| 10.2 | Sleep under a net | 1. Yes  2. No |
| 10.3 | Drugs | 1. Yes  2. No |
| 10.4 | Keep environment around the HH clean and clear | 1. Yes  2. No |
| 10.5 | Close doors and windows early (6:00 PM) | 1. Yes  2. No |
| 10.6 | Use of Mosquitoes repellant/Coils | 1. Yes  2. No |
| 10.7 | I don’t know | 1. Yes  2. No |

11. Do you know the signs and symptoms of malaria in adults and children?

1. Yes
2. No

11.0 Sign of fever

| **SN** | **Item** | **Responses** |
| --- | --- | --- |
| 11.1 | Extreme weakness | 1. Yes  2. No |
| 11.2 | Loss of consciousness | 1. Yes  2. No |
| 11.3 | Rapid/ difficulty in breathing | 1. Yes  2. No |
| 11.4 | Dark urine | 1. Yes  2. No |
| 11.5 | Fever | 1. Yes  2. No |
| 11.6 | Joint pain | 1. Yes  2. No |
| 11.7 | Headache | 1. Yes  2. No |

13. Number of days to took to seek treatment after the baby started feeling fevered

1. Same day
2. 2 days
3. More than 2 days

13.0 Reason for delayed care seeking

| SN | Item | Response |
| --- | --- | --- |
| 13.1 | No transport | 1. Yes  2. No |
| 13.2 | Fever not serious | 1. Yes  2. No |
| 13.3 | Treatment cost very expensive | 1. Yes  2. No |
| 13.4 | Too much house work | 1. Yes  2. No |
| 13.5 | Far distance to health facility | 1. Yes  2. No |
| 13.6 | Lack of medicine from the health facility | 1. Yes  2. No |
| 13.7 | Home treatment | 1. Yes  2. No |
| 13.8 | Not aware of form of fever | 1. Yes  2. No |

14. Are you concerned that malaria could threaten the life of your family members?

1. Yes
2. No
3. Never thought about it
