# Supplementary material
Source: Research Square preprint supplement (doi:10.21203/rs.3.rs-8568329/v1)
Supplement: Supplementary file 2 [file be22a1081ad9473739ace27d.docx]

**Supplementary Table 1: Bivariate analysis of factors associated with severe malaria**

| **Variables** | **Central** | | | **Bunyoro** | | |
| --- | --- | --- | --- | --- | --- | --- |
|  | **Yes n(%)** | **No n(%)** | **COR (95% CI)** | **Yes n(%)** | **No n(%)** | **COR (95% CI)** |
| **Health Facility** |  |  |  |  |  |  |
| Health center II | 237(48.7) | 45(29.8) | Reference | 98(20.6) | 34(25.2) | Reference |
| Health center III | 250(51.3) | 106(70.2) | 2.23(1.51, 3.30)*** | 148(31.2) | 39(28.9) | 0.76(0.45, 1.28) |
| Health center IV | - | - |  | 229(48.2) | 62(45.9) | 0.78(0.48, 1.26) |
| **Marital status** |  |  |  |  |  |  |
| Single | 78(16.0) | 29(19.2) | Reference | 45(9.5) | 8(5.9) | Reference |
| Married | 368(75.6) | 105(69.5) | 0.77(0.47, 1.23) | 399(84.0) | 119(88.2) | 1.67(0.77, 3.66) |
| Divorced | 8(1.6) | 4(2.6) | 1.34(0.37, 4.81) | 17(3.6) | 0(0) | - |
| Widowed | 33(6.8) | 13(8.6) | 1.06(0.49, 2.28) | 14(2.90 | 8(5.9) | 3.21(1.01, 10.14)* |
| **Religious affiliation** |  |  |  |  |  |  |
| Anglican | 161(33.1) | 51(33.8) | Reference | 153(32.2) | 48(35.6) | Reference |
| Catholics | 148(30.4) | 52(34.4) | 1.11(0.71, 1.73) | 242(50.9) | 63(46.7) | 0.83(0.54, 1.27) |
| Muslim | 87(17.8) | 25(16.6) | 0.91(0.53, 1.56) | 20(4.2) | 11(8.2) | 1.75(0.78, 3.92) |
| Born again | 82(16.8) | 21(13.9) | 0.81(0.45, 1.43) | 33(6.9) | 9(6.7) | 0.87(0.39, 1.95) |
| SDA | 7(1.4) | 1(0.6) | 0.45(0.05, 3.75) | 12(2.5) | 1(0.7) | 0.26(0.03, 2.10) |
| Others | 2(0.4) | 1(0.6) | 1.57(0.14, 17.77) | 15(3.2) | 3(2.2) | 0.64(0.78, 2.30) |
| **Education Level** |  |  |  |  |  |  |
| Nonformal | 44(9.0) | 20(13.3) | Reference | 76(16.0) | 24(17.8) | Reference |
| Primary | 315(64.7) | 106(70.2) | 0.74(0.42, 1.31) | 319(67.2) | 93(68.9) | 0.92(0.55, 1.54) |
| Secondary | 116(23.8) | 22(14.6) | 0.42(0.21, 0.84)* | 69(14.5) | 17(12.6) | 0.78(0.40, 1.57) |
| Tertiary/ University | 12(2.5) | 3(2.0) | 0.55(0.14, 2.17) | 11(2.3) | 1(0.7) | 0.29(0.04, 2.35) |
| **Occupation** |  |  |  |  |  |  |
| Unemployed | 32(6.6) | 16(10.6) | Reference | 23(4.8) | 7(5.2) | Reference |
| Peasant | 346(71.1) | 113(74.8) | 0.65(0.35, 1.23) | 411(86.5) | 116(85.9) | 0.93(0.39, 2.22) |
| Self employed | 97(19.9) | 17(11.3) | 0.35(0.16, 0.77)** | 37(7.8) | 11(8.2) | 0.97(0.33, 2.88) |
| Professional | 12(2.5) | 5(3.3) | 0.83(0.25, 2.78) | 4(0.8) | 1(0.7) | 0.82(0.08, 8.60) |
| **Structure of house** |  |  |  |  |  |  |
| Grass thatched | 36(7.4) | 22(14.6) | Reference | 210(44.2) | 79(58.5) | Reference |
| Made of mud | 77(15.8) | 22(14.6) | 0.47(0.23, 0.95)* | 67(14.1) | 17(12.6) | 0.67(0.34, 1.22) |
| Semi-permanent | 143(29.4) | 47(31.1) | 0.54(0.29, 1.00) | 91(19.2) | 22(16.3) | 0.64(0.38, 1.10) |
| Permanent | 231(47.4) | 60(39.7) | 0.43(0.23, 0.78)** | 107(22.5) | 17(12.6) | 0.42(0.24, 0.75)* |
| **Age of child** |  |  |  |  |  |  |
| 0 to 1 | 114(23.4) | 49(32.5) | Reference | 159(33.5) | 36(26.7) | Reference |
| 1 to 2 | 97(19.9) | 27(17.9) | 0.65(0.37, 1.11) | 92(19.4) | 28(20.7) | 1.34(0.77, 2.35) |
| 2 to 3 | 114(23.4) | 30(19.9) | 0.61(0.36, 1.03) | 80(16.8) | 32(23.7) | 1.77(1.02, 3.05)* |
| 3 to 4 | 102(20.9) | 28(18.5) | 0.64(0.37, 1.10) | 89(18.7) | 21(15.6) | 1.04(0.57, 1.89) |
| 4 to 5 | 60(12.3) | 17(11.3) | 0.66(0.35, 1.24) | 55(11.6) | 18(13.3) | 1.45(0.76, 2.75) |
| **Sex of child** |  |  |  |  |  |  |
| Male | 234(48.1) | 82(54.3) | Reference | 240(50.5) | 67(49.6) | Reference |
| Female | 253(51.9) | 69(45.7) | 0.78(0.54, 1.12) | 235(49.5) | 68(50.4) | 1.04(0.71, 1.52) |
| **Health Facility** |  |  |  |  |  |  |
| Health center II | - | - |  | 76(19.1) | 12(21.8) | Reference |
| Health center III | 154(100) | 30(100) |  | 321(80.4) | 41(74.6) | 0.81(0.41, 1.61) |
| Health center IV | - | - |  | 2(0.5) | 2(3.6) | 6.33(0.81, 49.31) |
| **Marital status** |  |  |  |  |  |  |
| Single | 3(2.0) | 2(6.7) | Reference | 17(4.3) | 1(1.8) | Reference |
| Married | 138(89.6) | 25(83.3) | 0.27(0.04, 1.71) | 366(91.7) | 53(96.4) | 2.46(0.32, 18.88) |
| Divorced | 7(4.6) | 0(0) | - | 4(1.0) | 0(0) | - |
| Widowed | 6(3.9) | 3(10.0) | 0.75(0.08, 7.21) | 12(3.0) | 1(1.8) | 1.42(0.08, 24 95) |
| **Religious affiliation** |  |  |  |  |  |  |
| Anglican | 51(33.1) | 11(36.7) | Reference | 141(35.3) | 25(45.5) | Reference |
| Catholics | 56(36.4) | 14(46.7) | 1.16(0.48, 2.79) | 166(41.6) | 19(34.6) | 0.65(0.34, 1.22) |
| Muslim | 1(0.7) | 0(0) | - | 31(7.8) | 6(10.9) | 1.10(0.41, 2.90) |
| Born again | 39(25.3) | 5(16.7) | 0.59(0.19, 1.85) | 55(13.8) | 5(9.1) | 0.51(0.19, 1.41) |
| SDA | 7(4.6) | 0(0) | - | 3(0.8) | 0(0) | - |
| Others | - | - | - | 3(0.8) | 0(0) | - |
| **Education Level** |  |  |  |  |  |  |
| Nonformal | 24(15.6) | 1(3.3) | Reference | 27(6.8)) | 8(14.6) | Reference |
| Primary | 98(63.6) | 25(83.3) | 6.12(0.79, 47.46) | 261(65.4) | 38(69.1) | 0.49(0.21, 1.16) |
| Secondary | 29(18.8) | 3(10.0) | 2.48(0.24, 25.44) | 101(25.3) | 8(14.6) | 0.27(0.09, 0.78)* |
| Tertiary/ University | 3(2.0) | 1(3.3) | 8.00(0.39, 164.01) | 10(2.5) | 1(1.8) | 0.33(0.04, 3.05) |
| **Occupation** |  |  |  |  |  |  |
| Unemployed | 5(3.3) | 0(0) | Reference | 17(4.3) | 5(9.1) | Reference |
| Peasant | 136(88.3) | 26(86.7) | - | 347(86.9) | 46(83.6) | 0.45(0.16, 1.30) |
| Self employed | 12(7.8) | 4(13.3) | 0.57(0.17, 1.92) | 34(8.5) | 4(7.3) | 0.40(0.09, 1.68) |
| Professional | 1(0.7) | 0(0) | - | 1(0.3) | 0(0) | - |
| **Structure of house** |  |  |  |  |  |  |
| Grass thatched | 4(2.6) | 1(3.3) | Reference | 182(45.6) | 24(43.6) | Reference |
| Made of mud | 70(45.5) | 16(53.3) | 0.91(0.10, 8.74) | 21(5.3) | 2(3.6) | 0.72(0.16, 3.27) |
| Semi-permanent | 63(40.9) | 9(30.0) | 0.57(0.06, 5.70) | 121(30.3) | 16(29.1) | 1.00(0.51, 1.96) |
| Permanent | 17(11.0) | 4(13.3) | 0.94(0.08, 10.87) | 75(18.8) | 13(23.6) | 1.31(0.64, 2.72) |
| **Age of child** |  |  |  |  |  |  |
| 0 to 1 | 36(23.4) | 10(33.3) | Reference | 136(34.1) | 15(27.3) | Reference |
| 1 to 2 | 39(25.3) | 7(23.3) | 0.65(0.22, 1.88) | 90(22.6) | 10(18.2) | 1.01(0.43, 2.34) |
| 2 to 3 | 36(23.4) | 5(16.7) | 0.50(0.16, 1.61) | 73(18.3) | 16(29.1) | 1.89(0.93, 4.25) |
| 3 to 4 | 36(23.4) | 6(20.0) | 0.60(0.20, 1.83) | 33(8.3) | 8(14.6) | 2.19(0.86, 5.62) |
| 4 to 5 | 7(4.6) | 2(6.7) | 1.03(0.18, 5.75) | 67(17.8) | 6(10.9) | 0.81(0.30, 2.19) |
| **Sex of child** |  |  |  |  |  |  |
| Male | 79(51.3) | 17(56.7) | Reference | 217(54.4) | 24(43.6) | Reference |
| Female | 75(48.7) | 13(43.3) | 0.81(0.37, 1.77) | 182(45.6) | 31(56.4) | 1.54(0.87, 2.72) |

**p<0.05, **p<0.01, ***p<0.001*
